# Supplementary material for: CMR—Quantified Epicardial Adipose Tissue Heterogeneity and Its Predictive Value for Ventricular and Atrial Arrhythmias After Myocardial Infarction
Source: Research Square preprint supplement (doi:10.21203/rs.3.rs-7531155/v1), 2025-10-17
Supplement: Supplementary file 1 [file fc5a50ebcbf4aad9ceaec650.docx]

Table S1. Comparative Analysis of Clinical Characteristics Stratified by EAT Entropy Groups

| Characteristics | EAT entropy＜6.73  (n=120) | EAT entropy≥6.73  (n=121) | P value |
| --- | --- | --- | --- |
| Age, y | 54±13 | 57±14 | 0.058 |
| Male | 89(74.17) | 87(71.90) | 0.692 |
| BMI, kg/m2 | 24.65±3.53 | 24.11±3.26 | 0.110 |
| Hypertension | 61(50.83) | 66(54.55) | 0.564 |
| Hypercholesterolemia | 95(79.17) | 93(76.86) | 0.665 |
| Diabetes mellitus | 32(26.67) | 30(24.79) | 0.739 |
| Smoking | 58(48.33) | 57(47.11) | 0.849 |
| NYHA class |  |  | 0.238 |
| I | 51(42.50) | 52(42.98) |  |
| II | 51(42.50) | 59(48.76) |  |
| III | 18(15.00) | 10(8.26) |  |
| MI type |  |  | 0.042* |
| STEMI | 66(55.00) | 82(67.77) |  |
| NSTEMI | 54(45.00) | 39(32.23) |  |
| Culprit arteries |  |  | 0.925 |
| LAD | 51(42.50) | 57(47.11) |  |
| LCX | 30(25.00) | 32(26.45) |  |
| RCA | 32(26.67) | 39(32.23) |  |
| Medication |  |  |  |
| Beta-blockers | 106(88.33) | 107(88.43) | 0.981 |
| RAAS-inhibitors | 83(69.17) | 92(76.03) | 0.232 |
| Statins | 109(90.83) | 112(92.56) | 0.627 |
| Loop diuretics | 39(32.50) | 49(40.50) | 0.197 |
| Aspirin | 98(81.67) | 107(88.43) | 0.141 |
| Clopidogrel/Prasugrel/Ticagrelor | 68(56.67) | 82(67.77) | 0.075 |

| Characteristics | EAT entropy＜6.73  (n=120) | EAT entropy≥6.73  (n=121) | P value |
| --- | --- | --- | --- |
| CI, L/min·m2 | 2.56±0.90 | 2.48±0.90 | 0.517 |
| LVMI, g/m2 | 54.10(20.44) | 55.28(18.72) | 0.581 |
| LVEDVI, mL/m2 | 79.28(43.70) | 81.84(54.95) | 0.680 |
| LVESVI, mL/m2 | 40.13(36.03) | 40.90(47.32) | 0.514 |
| LVEF, % | 46.54(23.14) | 46.83(25.37) | 0.354 |
| Es, % (reservoir) | 26.00(9.00) | 24.00(9.00) | 0.029* |
| Ee, % (conduit) | 15.30(7.00) | 15.00(8.00) | 0.375 |
| Ea, % (contraction) | 14.00(7.00) | 11.00(7.00) | 0.010* |
| LACI, % | 19.28(10.68) | 25.78(10.80) | ＜0.001* |
| Degree of transmural |  |  | 0.054 |
| ≤25% | 46(38.33) | 57(47.11) |  |
| 26%-50% | 27(22.50) | 12(9.92) |  |
| 51%-75% | 24(20.00) | 30(24.79) |  |
| ≥76% | 23(19.17) | 22(18.18) |  |
| IC, % | 13.47(10.90) | 15.50(13.21) | 0.027* |
| BZ, % | 5.67(5.24) | 7.39(7.27) | 0.013* |
| IBZ, % | 20.21(18.05) | 23.98(20.68) | 0.017* |
| GRS, % | 23.37±10.17 | 22.22±11.52 | 0.415 |
| GCS, % | -15.59(7.53) | -14.76(8.33) | 0.145 |
| GLS, % | -11.60±4.34 | -10.75±3.91 | 0.111 |
| mitral regurgitation | 34(28.33) | 42(34.71) | 0.287 |
| aortic regurgitation | 14(11.67) | 24(19.83) | 0.082 |
| MVO | 3(2.50) | 10(8.26) | 0.048* |
| ventricular aneurysm | 12(10.00) | 18(14.88) | 0.252 |

Table S2. Comparative Analysis of CMR Characteristics Stratified by EAT Entropy Groups
